# Supplementary material for: Identification of gingerenone A as a novel senolytic compound
Source: PubMed Central journal article supplement (PMC8963586; doi:10.1371/journal.pone.0266135), 2022-03-29

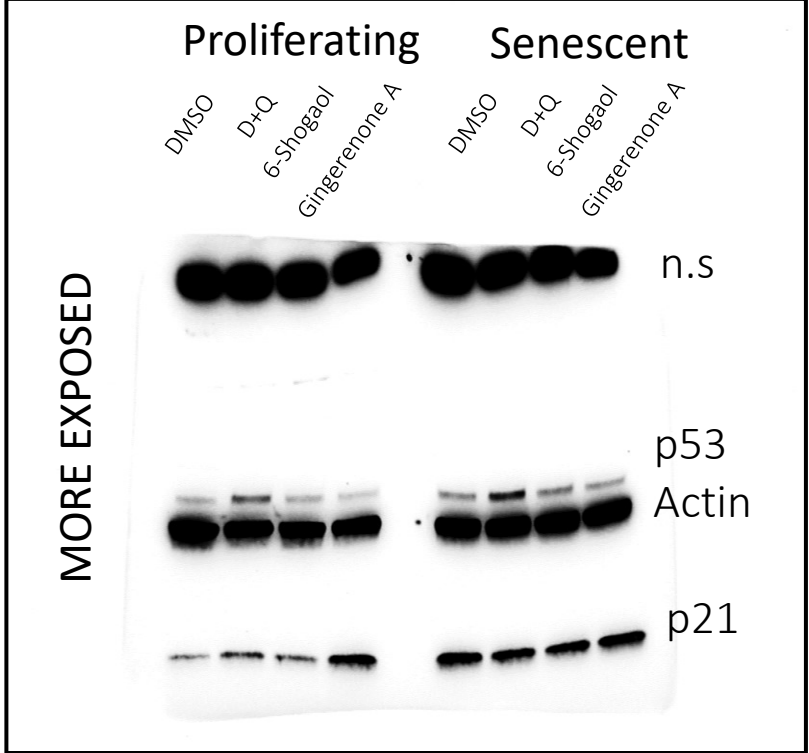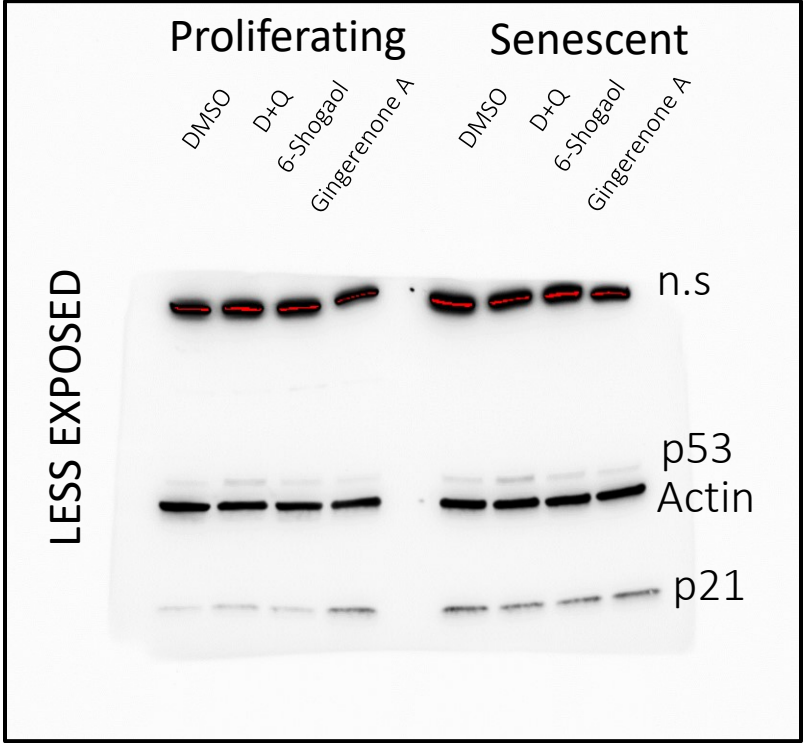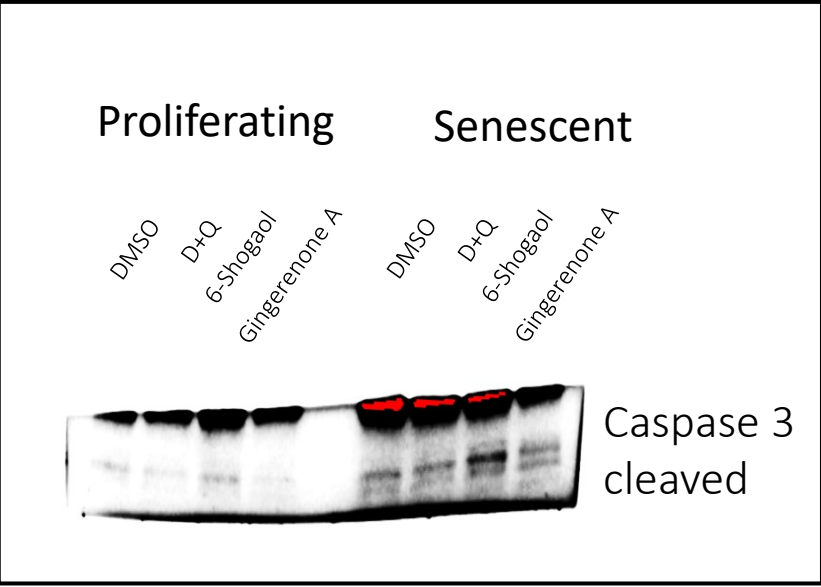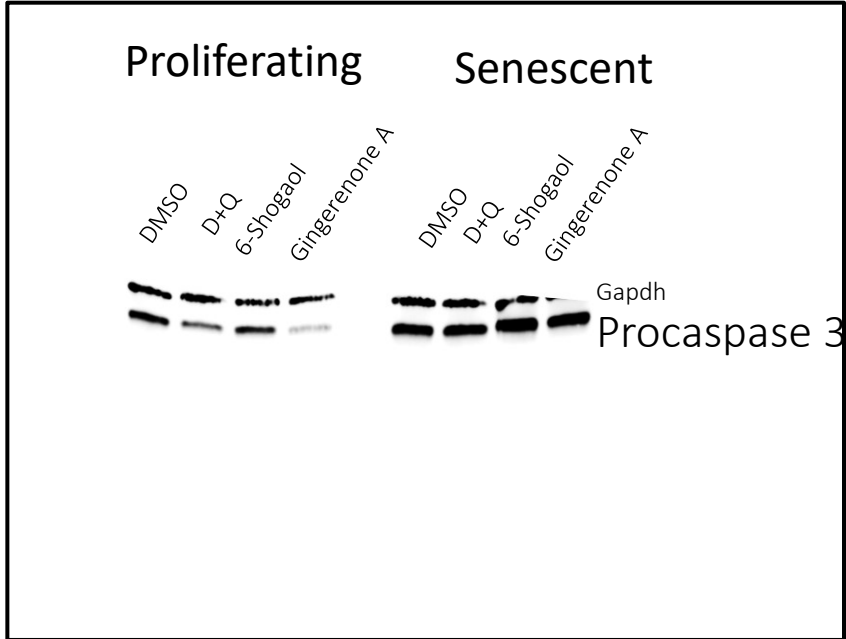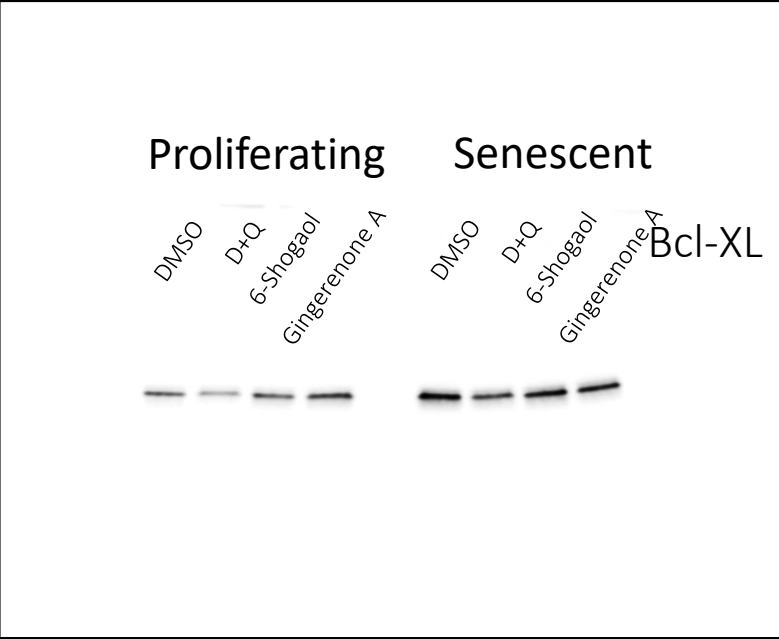

Supplement: pone.0266135.s002.pdf [file pone.0266135.s002.pdf]
